# Supplementary figures and images for: Clinicopathological and Molecular Prognostic Classifier for Intermediate/High-Risk Clear Cell Renal Cell Carcinoma
Source: MDPI journal article supplement (doi:10.3390/cancers13246338), 2021-12-17

Supplementary Figure S3

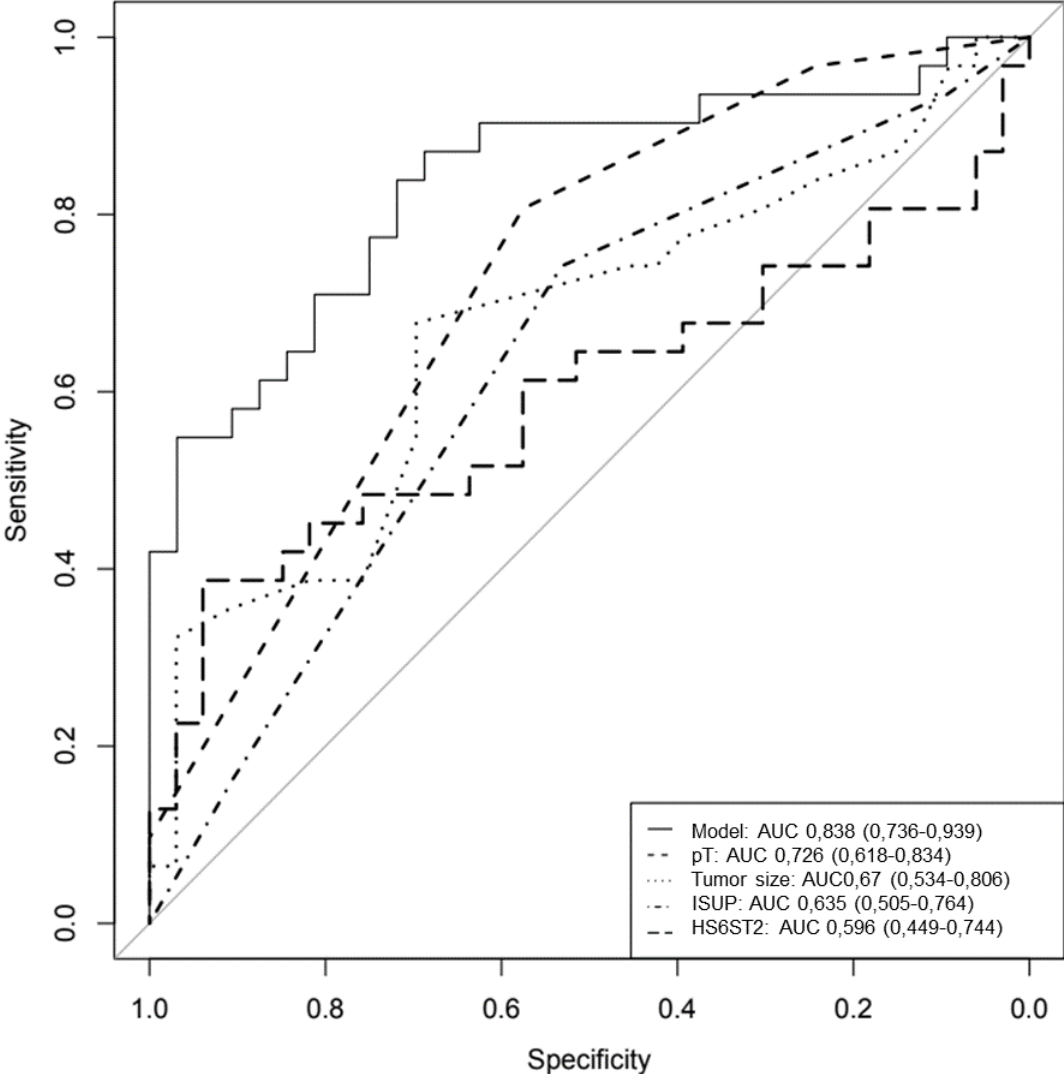

Supplement: s1 [file s1]

Supplementary Figure S1.

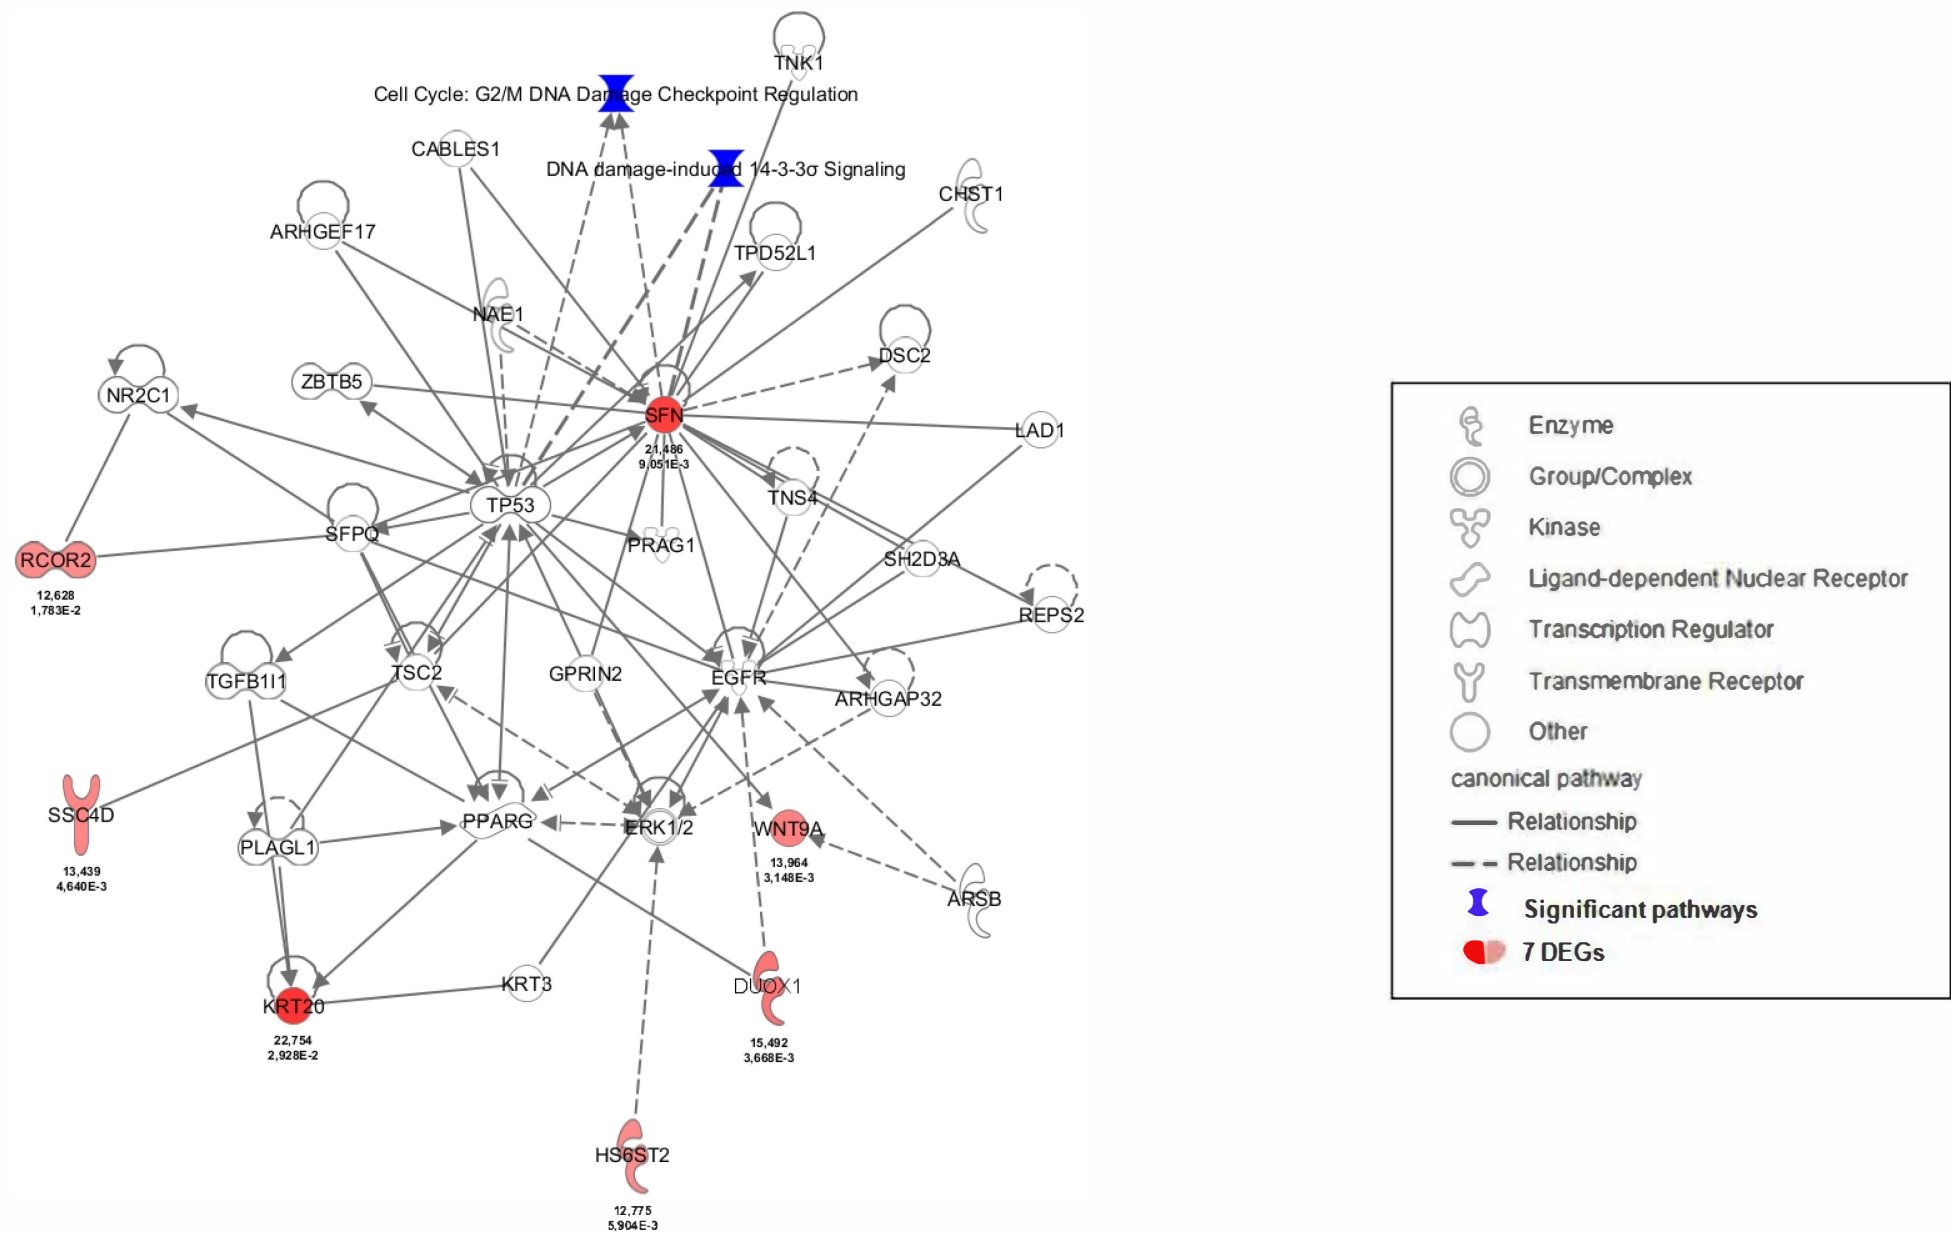

Supplement: s1 [file s1]

Supplementary Figure S2.

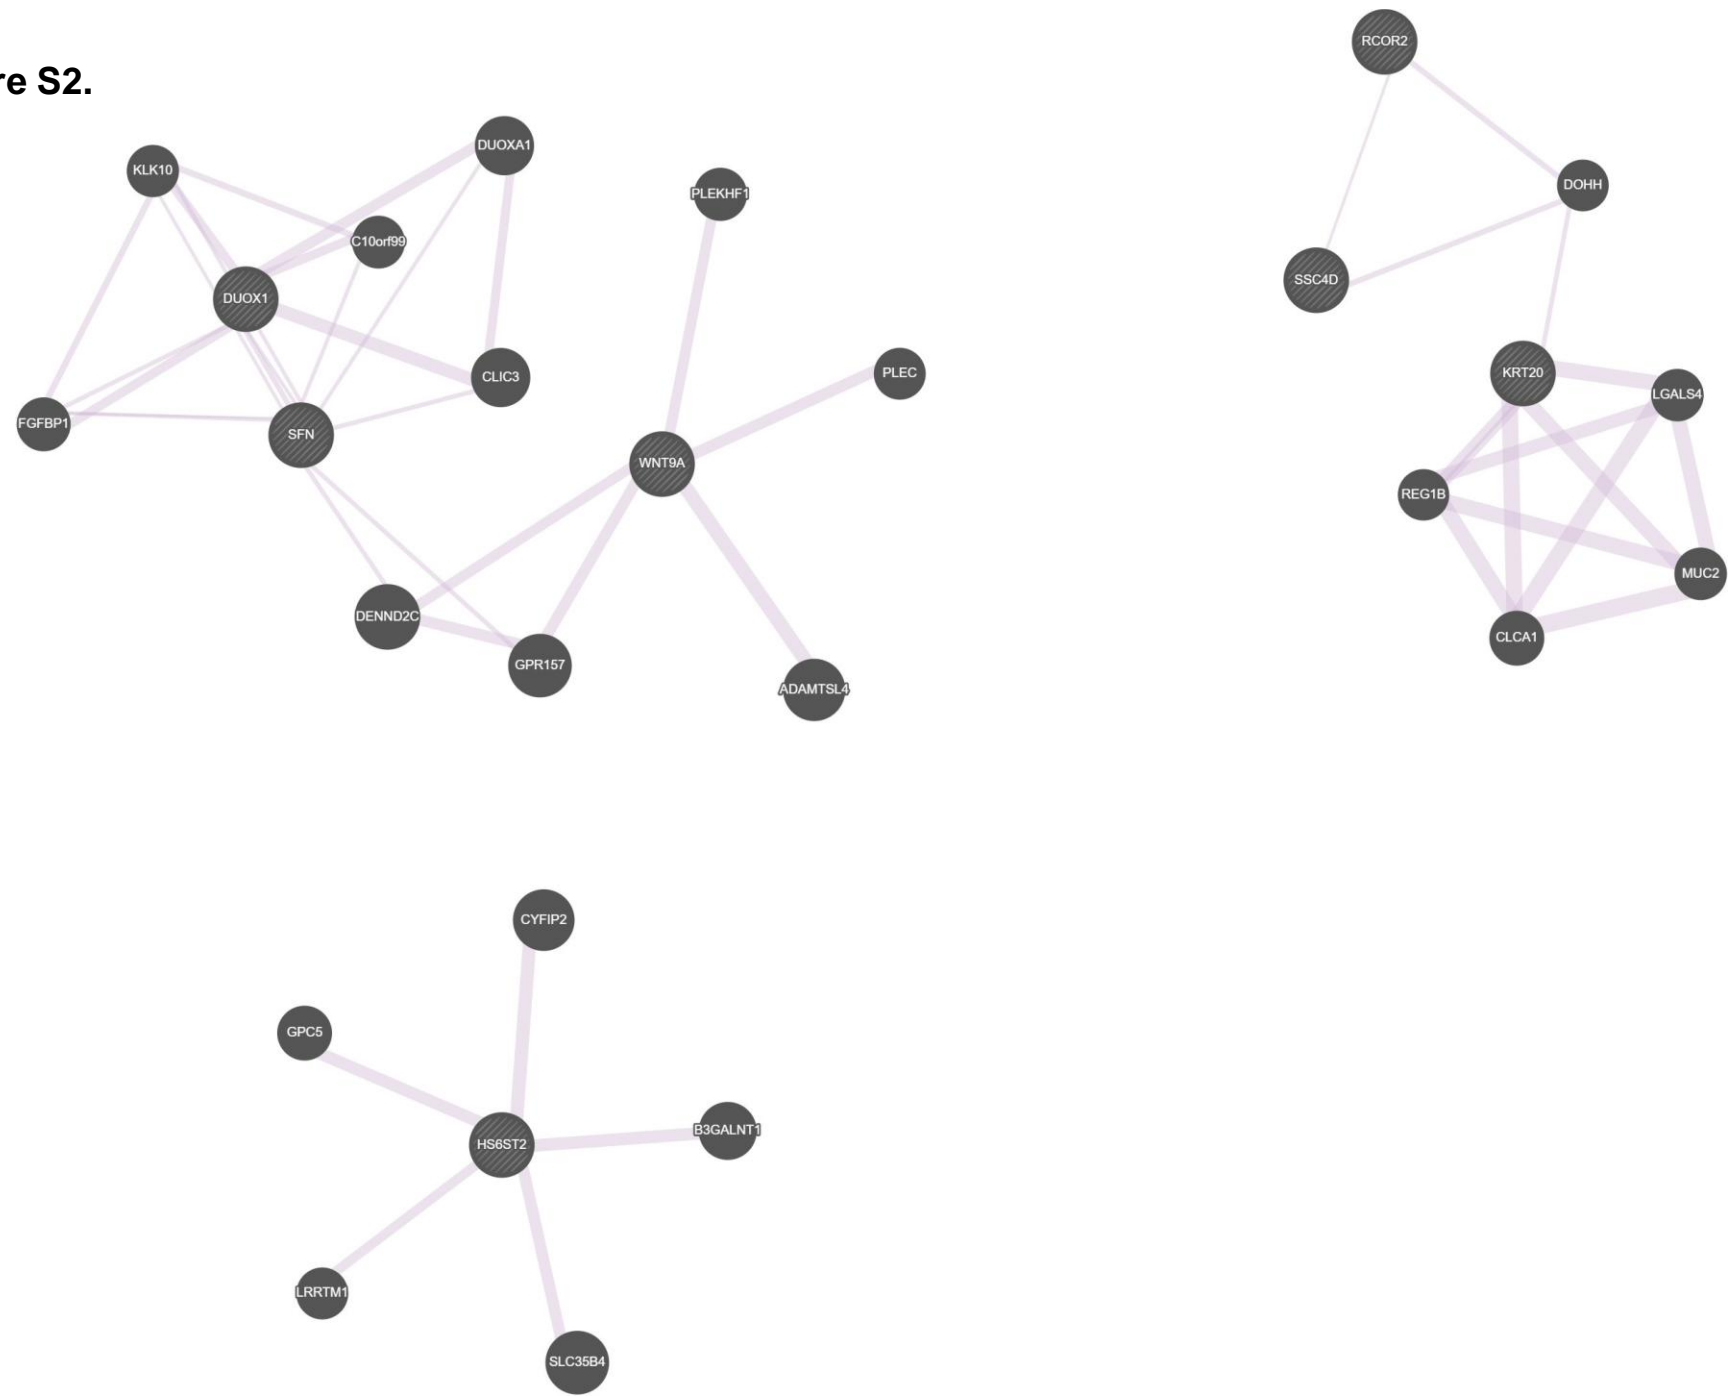

Supplement: s1 [file s1]

Supplementary Figure S4.

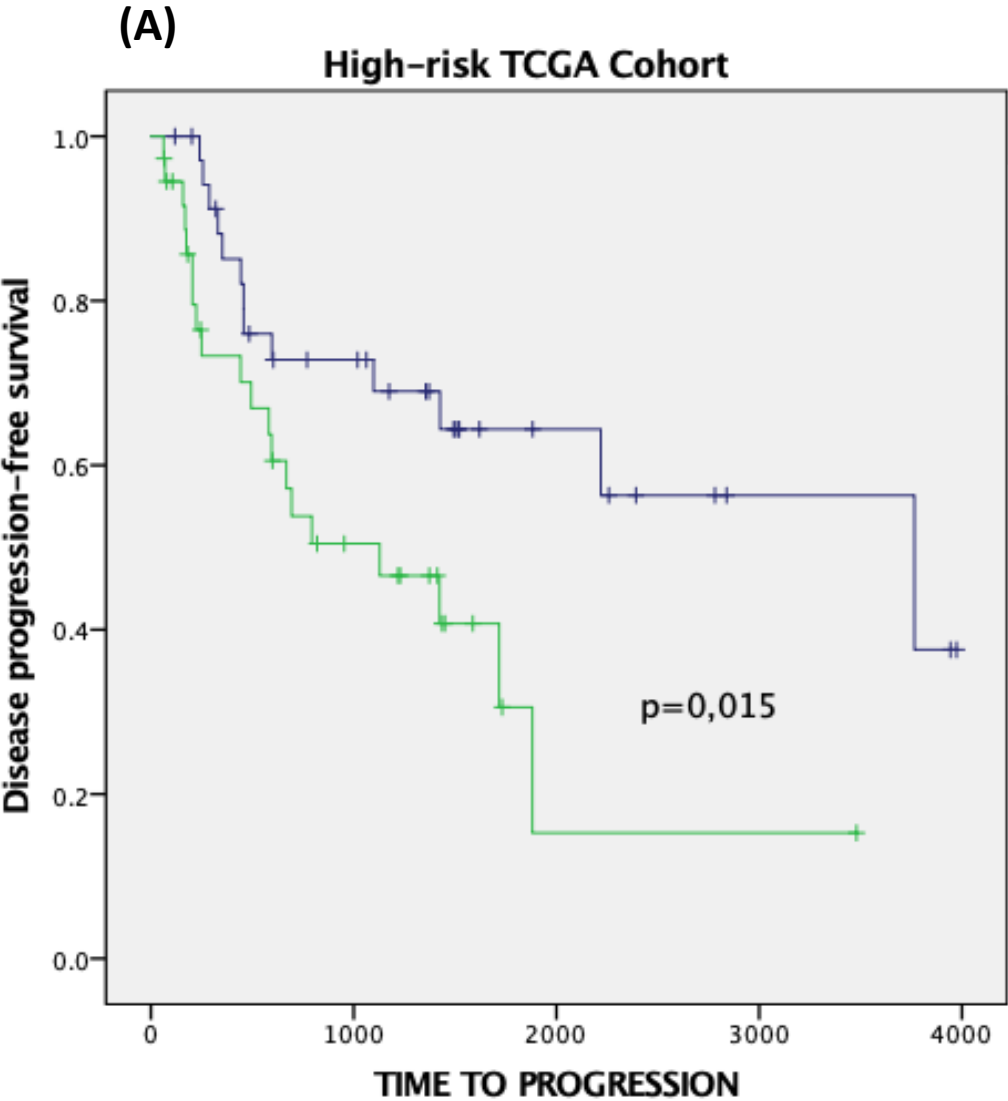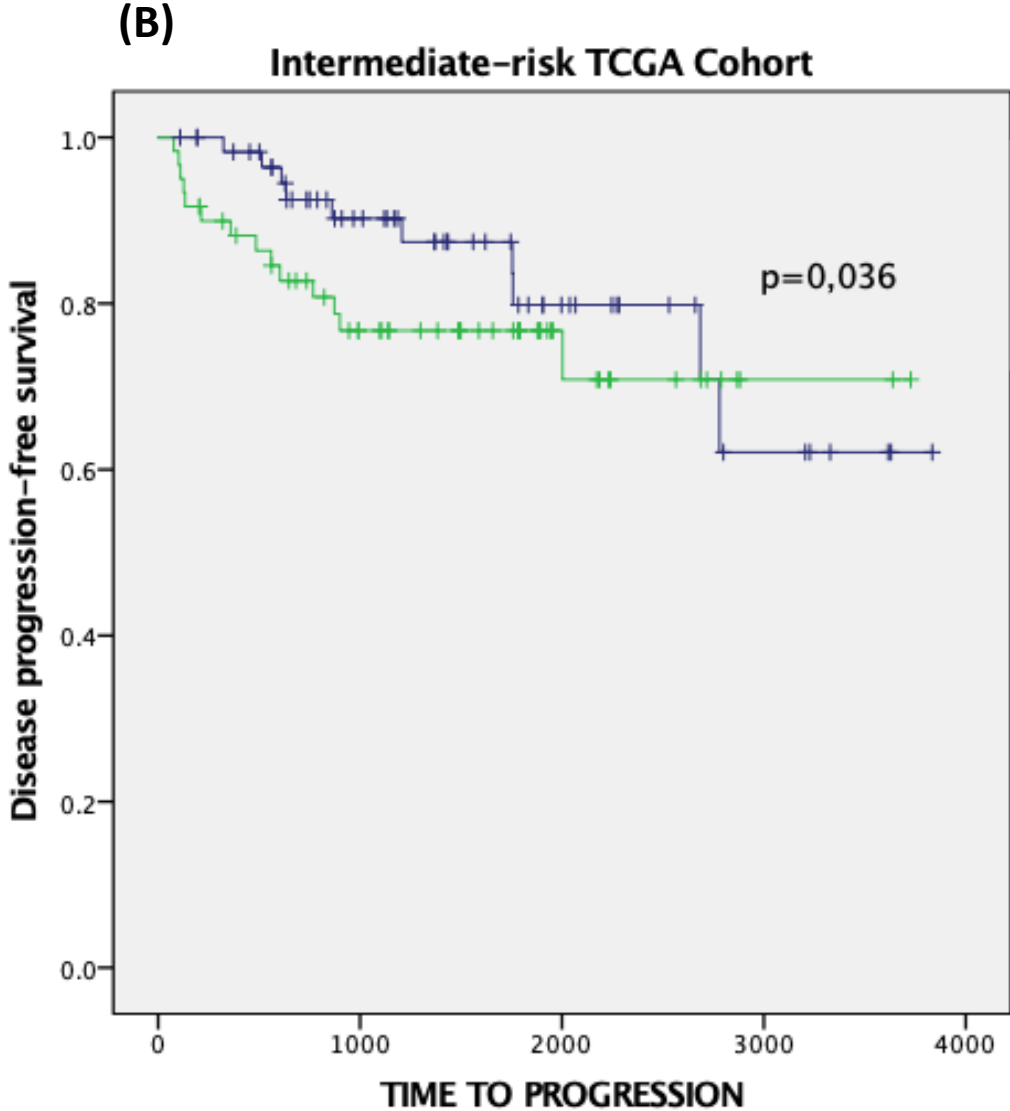

Supplement: s1 [file s1]
